# Supplementary material for: Antioxidant properties of Artemisia herba-alba and Eucalyptus camaldulensis essentials oils on malathion-induced reproductive damage in rat
Source: Royal Society of Chemistry journal article supplement (doi:10.1039/c6ra18268b), 2016-01-01
Supplement: c6ra18268b1.pdf [file c6ra18268b1.pdf]

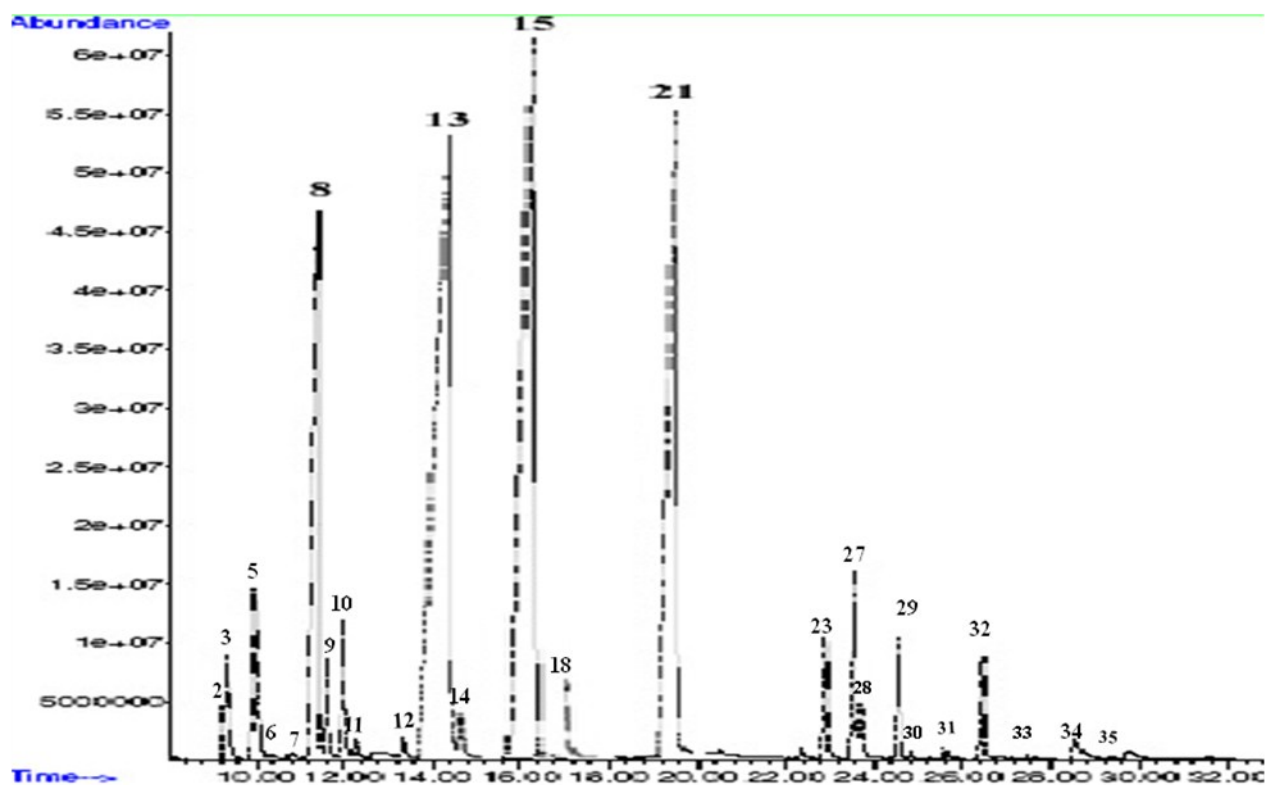

**Figure 1S:** Total ion chromatogram of the essential oil of *A. herba-alba*. Numbers referred to the main components (Table 1).

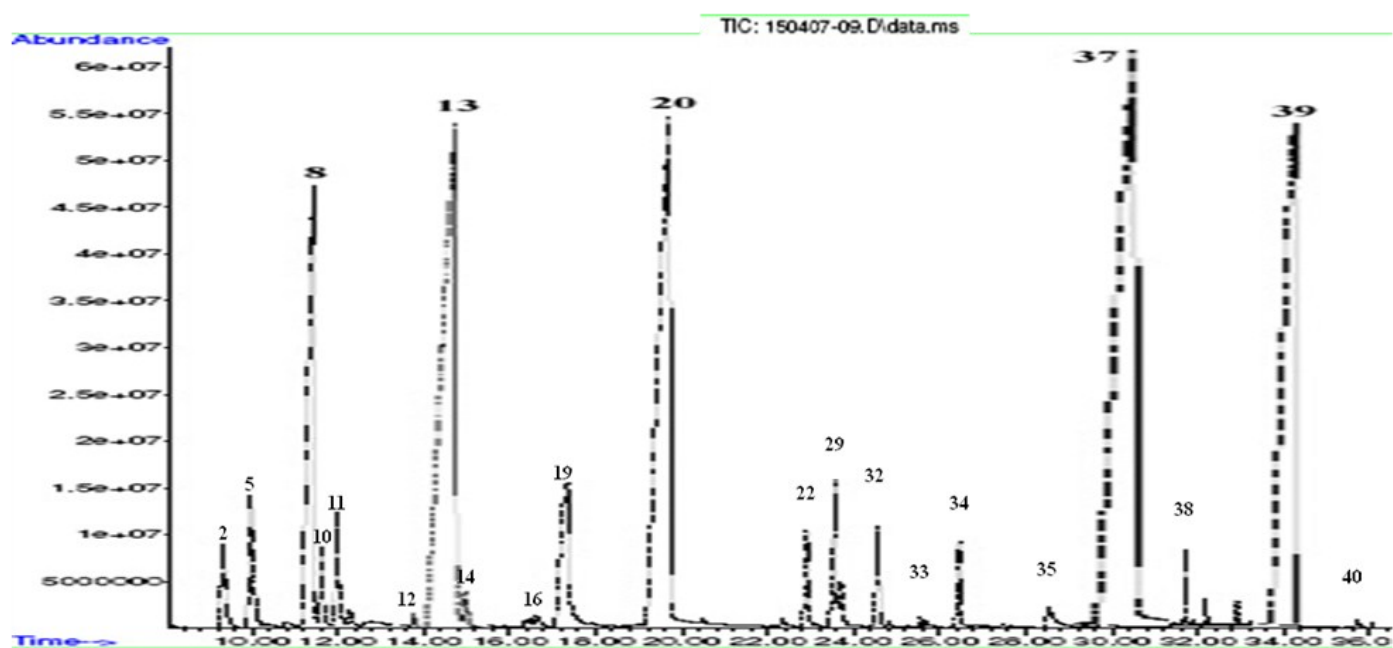

**Figure 2S:** Total ion chromatogram of the essential oil of *E. camaldulensis*. Numbers referred to the main components (Table 1).
